# Supplementary material
Source: PubMed Central journal article supplement (PMC3422893)
Supplement: NIHMS335559-supplement-1_si_001.pdf [file NIHMS335559-supplement-1_si_001.pdf]

## Supporting Information

### Activation of the c-Jun N-terminal Kinase /Activating Transcription Factor 3 (ATF3) Pathway Characterizes Effective Arylated Diazeniumdiolate-Based Nitric Oxide-Releasing Anticancer Prodrugs.

Anna E. Maciag,<sup>†,#,\*</sup> Rahul S. Nandurdikar,<sup>‡,#</sup> Sam Y. Hong,<sup>‡</sup> Harinath Chakrapani,<sup>⊥</sup> Bhalchandra Diwan,<sup>†</sup> Nicole L. Morris,<sup>§</sup> Paul J. Shami,<sup>||</sup> Yih-Horng Shiao,<sup>‡</sup> Lucy M. Anderson,<sup>‡</sup> Larry K. Keefer,<sup>‡</sup> and Joseph E. Saavedra<sup>†</sup>

<sup>†</sup>*Basic Science Program, SAIC-Frederick, Inc., National Cancer Institute, Frederick, MD 21702,* <sup>‡</sup>*Laboratory of Comparative Carcinogenesis, National Cancer Institute, Frederick, MD 21702,* <sup>⊥</sup>*Department of Chemistry, Indian Institute of Science Education and Research, Pune 411008, India,* <sup>§</sup>*Laboratory Animal Sciences Program, SAIC-Frederick, Inc., National Cancer Institute, Frederick, MD 21702,* <sup>||</sup>*Division of Hematology and Hematologic Malignancies, Huntsman Cancer Institute, University of Utah, Salt Lake City, UT 84112*

#### Table of contents

- |                                                            |         |
|------------------------------------------------------------|---------|
| 1. CHN analysis data                                       | page S2 |
| 2. Decomposition kinetics of compound <b>6</b>             | page S3 |
| 3. Pathology report and immunohistochemistry staining data | page S4 |

**Table S1.** Elemental analysis (CHN) for compounds **6**, **7**, **9** and **11**.

| Compound  | Molecular formula                                                        | Theoretical (%) |      |       | Experimental (%) |      |       |
|-----------|--------------------------------------------------------------------------|-----------------|------|-------|------------------|------|-------|
|           |                                                                          | C               | H    | N     | C                | H    | N     |
| <b>6</b>  | C <sub>14</sub> H <sub>18</sub> N <sub>6</sub> O <sub>8</sub> ·14% ether | 42.89           | 4.83 | 20.43 | 42.60            | 4.71 | 20.09 |
| <b>7</b>  | C <sub>15</sub> H <sub>20</sub> N <sub>6</sub> O <sub>8</sub>            | 43.69           | 4.89 | 20.38 | 43.96            | 4.87 | 20.08 |
| <b>9</b>  | C <sub>14</sub> H <sub>18</sub> N <sub>6</sub> O <sub>9</sub>            | 40.58           | 4.38 | 20.28 | 40.45            | 4.43 | 20.09 |
| <b>11</b> | C <sub>15</sub> H <sub>20</sub> N <sub>6</sub> O <sub>9</sub>            | 42.06           | 4.71 | 19.62 | 42.24            | 4.67 | 19.35 |

**Figure S1.** Reaction of compound **6** with 4 mM GSH (glutathione) in pH 7.4 phosphate buffered saline at 37° C followed by HPLC.

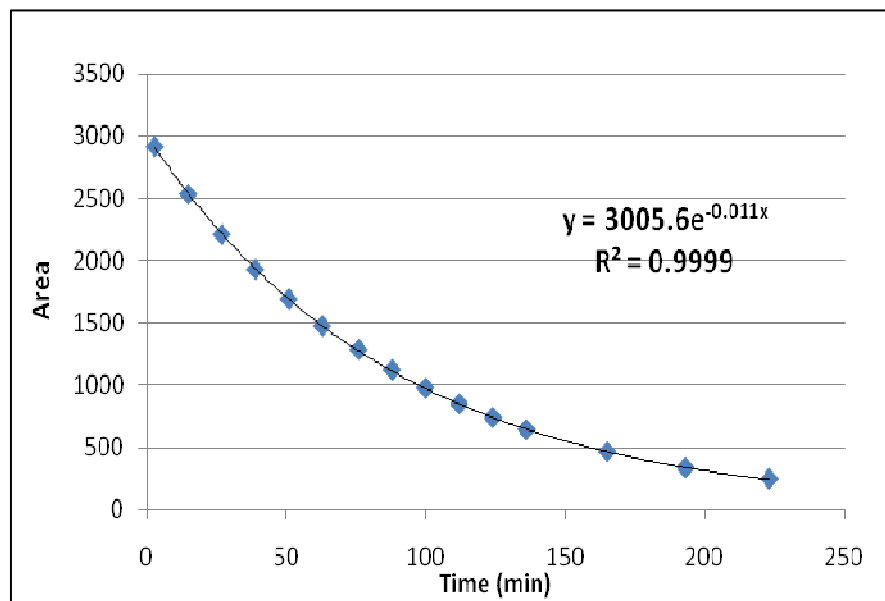

**Table S2.** Decay of compound **6** over time, in the presence of GSH, as determined by HPLC analysis.

| Time (min) | Peak area | % Compound <b>6</b> unreacted |
|------------|-----------|-------------------------------|
| 3.0        | 2914.6    | 100.0                         |
| 15.0       | 2533.6    | 86.9                          |
| 27.0       | 2209.6    | 75.8                          |
| 39.0       | 1928.5    | 66.2                          |
| 51.0       | 1690.0    | 58.0                          |
| 63.0       | 1474.0    | 50.6                          |
| 76.0       | 1284.3    | 44.1                          |
| 88.0       | 1120.9    | 38.5                          |
| 100.0      | 976.2     | 33.5                          |
| 112.0      | 847.1     | 29.1                          |
| 124.0      | 737.5     | 25.3                          |
| 136.0      | 642.2     | 22.0                          |
| 165.0      | 464.1     | 15.9                          |
| 193.0      | 335.7     | 11.5                          |
| 223.0      | 246.0     | 8.4                           |

<sup>a</sup>Peak area at time 3 min is considered as 100% unreacted compound.

**Table S3.** Immunohistochemical analysis of xenograft tumors. The staining intensities in tumor tissues were categorized as negative (-), very weak (-/+), weak (+), moderate (++) or strong (+++).

| Animal number | Treatment | Histopathology                                                                       | P-SAPK/JNK | ATF3 |
|---------------|-----------|--------------------------------------------------------------------------------------|------------|------|
| 2,4           | 1         | Tumor with large areas of necrosis;                                                  | +++        | +++  |
| 2,7           | 1         | A large area of central necrosis, tumor cells at the periphery;                      | ++         | +++  |
| 2,11          | 1         | A large tumor invading muscles, small area of necrosis;                              | +++        | +++  |
| 2,12          | 1         | A large, well-vascularized tumor, area of necrosis at the periphery;                 | +++        | +++  |
| 2,13          | 1         | A well-vascularized tumor with multiple focal areas of necrosis in the center;       | ++         | +++  |
| 2,14          | 1         | A large tumor with minimal necrosis in the center;                                   | +++        | +++  |
| 2,20          | 1         | A large, well-vascularized tumor, small area of necrosis at the periphery;           | ++         | ++   |
| 2,6           | Vehicle   | A large, well-vascularized tumor with areas of necrosis at the center and periphery; | -/+        | +    |
| 2,9           | Vehicle   | A large, well-vascularized tumor, minimal necrosis at the periphery;                 | -          | -/+  |
| 2,10          | Vehicle   | A large, well-vascularized tumor, minimal necrosis at the periphery;                 | -          | -/+  |
| 3,2           | 2         | Small tumor, necrosis in the center;                                                 | +++        | ++   |
| 3,4           | 2         | A large central area of necrosis, tumor cells only at the periphery;                 | ++         | +++  |
| 3,5           | 2         | A large tumor, central necrosis;                                                     | +++        | +++  |
| 3,6           | 2         | Necrosis wide spread, both at the center and periphery;                              | +++        | +++  |
| 3,7           | 2         | Extensive necrosis in the center of a large tumor;                                   | +++        | +++  |
| 3,12          | 2         | Extensive necrosis in the center, tumor cells at the periphery;                      | +++        | +++  |
| 3,14          | 2         | Small tumor, necrosis at the periphery;                                              | +++        | +++  |
| 3,16          | Vehicle   | A well-vascularized large tumor, large blood vessels;                                | -/+        | -/+  |
| 3,17          | Vehicle   | A large tumor invading muscles, many blood vessels;                                  | -          | -    |
| 3,23          | Vehicle   | A large tumor with cysts and large blood vessels;                                    | -/+        | -    |
| 5,1           | 6         | A large tumor, well-vascularized with cysts, no necrosis seen;                       | -          | -/+  |
| 5,4           | 6         | A large tumor, small area of necrosis in the center;                                 | -          | -/+  |
| 5,5           | 6         | A large invasive tumor, no necrosis seen;                                            | -          | +    |
| 5,6           | 6         | A large invasive tumor, a very small area of necrosis in the center;                 | -          | -/+  |
| 5,7           | 6         | A large tumor invading muscles, no necrosis seen;                                    | -          | -/+  |
| 5,8           | 6         | A small tumor with small areas of necrosis in the center and periphery;              | -          | +    |
| 5,11          | 6         | A large, well-vascularized tumor, no necrosis seen;                                  | -          | -/+  |
| 5,12          | Vehicle   | A large tumor with cysts and large blood vessels, no necrosis seen;                  | -          | -/+  |
| 5,17          | Vehicle   | A small tumor with a very small area of necrosis at the periphery;                   | -          | -/+  |
| 5,24          | Vehicle   | A large, well-vascularized tumor, no necrosis seen;                                  | -          | -/+  |
